# Supplementary material
Source: PubMed Central journal article supplement (PMC4788028)
Supplement: carc834804.ww1_default.pdf [file carc834804.ww1_default.pdf]

## Supplementary Table A: Description of the population

Note: All N, % and means are weighted using survey and non-response weights [posted as supplied by author]

| Characteristic                                           | Unplanned   | Mistimed    | Planned     | Sub-fertile | OI         | ART        |
|----------------------------------------------------------|-------------|-------------|-------------|-------------|------------|------------|
| <b>Unweighted N (%)</b>                                  | 1822 (15)   | 3327 (26)   | 6244 (53)   | 480 (4)     | 167 (1.4)  | 96 (1)     |
| Male child (N, %)                                        | 941 (50.6)  | 1665 (50.3) | 3404 (51.2) | 246 (48.3)  | 88 (48.6)  | 51 (46.9)  |
| Non-White (N, %)                                         | 234 (12.6)  | 467 (14.1)  | 682 (10.3)  | 53 (10.4)   | 8 (4.4)    | 14 (13.3)  |
| Age at 3 year questionnaire (mean, years)                | 3.13        | 3.14        | 3.11        | 3.12        | 3.11       | 3.10       |
| Age at 5 year questionnaire (mean, years)                | 5.21        | 5.21        | 5.20        | 5.21        | 5.19       | 5.15       |
| <b>Parents characteristics</b>                           |             |             |             |             |            |            |
| Family structure (N, % married)                          | 597 (32.1)  | 1577 (47.7) | 5143 (77.4) | 408 (80.3)  | 151 (83.5) | 97 (89.6)  |
| Family structure (N, % lone parent)                      | 674 (36.2)  | 618 (18.7)  | 251 (3.8)   | 17 (3.3)    | 4 (2.3)    | 3 (2.3)    |
| Income at 9 months (mean, £ per annum)                   | 16,040      | 17,780      | 27,250      | 27,090      | 31,550     | 30,220     |
| Household social class (N, % profess. or managerial)     | 478 (25.7)  | 1179 (35.6) | 3845 (58.0) | 292 (57.4)  | 120 (66.1) | 71 (66.2)  |
| Mother's age at birth of child (yrs, mean)               | 26.8        | 27.7        | 30.0        | 31.6        | 31.7       | 33.7       |
| Mother's educational attainment (N, % degree)            | 412 (22.1)  | 967 (29.2)  | 2999 (45.1) | 218 (42.9)  | 94 (52.0)  | 53 (49.0)  |
| Cohort member is Mother's first child (N, %)             | 661 (35.5)  | 1492 (45.1) | 2635 (39.6) | 266 (52.3)  | 110 (60.8) | 75 (69.6)  |
| Mother has ever suffered depression (N, %)               | 26.4        | 17.0        | 11.7        | 12.1        | 10.4       | 10.1       |
| Father interviewed (N, %)                                | 972 (52.1)  | 2167 (65.5) | 5427 (81.7) | 417 (81.9)  | 153 (84.5) | 88 (81.2)  |
| Father's age at birth of child (yrs, mean)               | 35.9        | 36.9        | 37.8        | 39.5        | 39.8       | 41.1       |
| Father's educational attainment (N, % degree)            | 267 (26.5)  | 75 (32.2)   | 2625 (45.7) | 187 (43.7)  | 83 (49.3)  | 50 (53.4)  |
| <b>Pregnancy-related variables</b>                       |             |             |             |             |            |            |
| When pregnancy was confirmed (mean, wks gestation)       | 8.7         | 7.9         | 6.8         | 6.5         | 5.9        | 3.9        |
| When first received antenatal care (mean, wks gestation) | 13.3        | 12.8        | 11.4        | 11.3        | 10.0       | 10.1       |
| Continued to smoke in pregnancy (N, %)                   | 690 (37.1)  | 881 (26.6)  | 892 (13.4)  | 90 (17.7)   | 22 (12.3)  | 5 (4.5)    |
| Moderate/high alcohol intake in pregnancy (N, %)         | 206 (11.0)  | 246 (7.4)   | 433 (6.5)   | 33 (6.6)    | 10 (6.5)   | 2 (1.6)    |
| Gestational age (mean, wks)                              | 39.1        | 39.1        | 39.3        | 39.2        | 39.0       | 38.4       |
| Birth weight (mean, kg)                                  | 3.33        | 3.34        | 3.43        | 3.32        | 3.31       | 3.20       |
| Breastfeeding (N, %, breastfed at all)                   | 1034 (55.6) | 2215 (66.9) | 5118 (77.0) | 399 (78.4)  | 145 (80.4) | 93 (86.7)  |
| <b>Parenting variables</b>                               |             |             |             |             |            |            |
| Weak postnatal attachment at 9mo (N, %)                  | 429 (28.0)  | 551 (19.9)  | 1373 (23.9) | 107 (24.2)  | 26 (16.3)  | 17 (17.9)  |
| Mother's positive relationship with child at 3yrs (mean) | 33.0        | 33.5        | 33.8        | 33.9        | 34.0       | 33.6       |
| Mother's involvement score at 5yrs (mean)                | 16.2        | 16.8        | 16.8        | 16.9        | 17.4       | 17.3       |
| Father's high Involvement score at 5yrs (N, %)           | 327 (33.6)  | 716 (33.0)  | 1803 (33.2) | 133 (31.9)  | 59 (38.3)  | 32 (36.2)  |
| <b>Childcare and Schooling</b>                           |             |             |             |             |            |            |
| Start childcare under 1yr old, (N, %)                    | 1010 (54.3) | 1800 (54.4) | 4080 (61.4) | 301 (59.2)  | 129 (71.3) | 62 (57.5)  |
| Hours in childcare at 3 years, (mean, per wk)            | 12.5        | 13.2        | 15.0        | 14.3        | 16.5       | 14.6       |
| Formal childcare at 3 years, (N, %)                      | 429 (21.5)  | 788 (21.9)  | 2207 (31.2) | 153 (30.0)  | 70 (38.6)  | 37 (34.6)  |
| Hours in childcare at 5 years (mean, per wk)             | 8.2         | 7.0         | 5.6         | 5.2         | 5.2        | 5.7        |
| Formal childcare at 5 years (N, %)                       | 74 (4.0)    | 118 (3.6)   | 415 (6.3)   | 23 (4.5)    | 10 (5.5)   | 4 (3.8)    |
| At school full time at 5 years (N, %)                    | 1806 (97.1) | 3207 (96.9) | 6471 (97.4) | 491 (96.5)  | 177 (97.6) | 106 (98.7) |
| <b>British Ability Scales II</b>                         |             |             |             |             |            |            |
| 3 year Verbal Ability score (mean)                       | 71.8        | 73.8        | 76.4        | 77.6        | 77.4       | 81.3       |
| 5 year Verbal Ability score (mean)                       | 105.9       | 107.1       | 110.5       | 112.0       | 115.0      | 114.0      |
| 5 year Non-Verbal Ability score (mean)                   | 81.1        | 81.2        | 83.1        | 82.7        | 81.9       | 82.5       |
| 5 year Spatial Ability score (mean)                      | 85.9        | 86.9        | 90.0        | 90.4        | 90.6       | 86.1       |

Population described are those in the 5 year analysis, N=12136. **Father's educational attainment** - % shown is % among fathers who responded (n=8905). **Parental involvement at 5 years** – mother's score is treated as a continuous variable and mean score reported. Father's score is categorised as low/medium/high so that on-responders and missing can be included. **Postnatal attachment** – a score in the lowest 25% of the population is considered clinically relevant<sup>25</sup>.
